# Supplementary material
Source: ML conference proceedings conference paper supplement (https://www.ecva.net/papers/eccv_2022/papers_ECCV/html/136990332_ECCV_2022_paper.php)
Supplement: Supplementary file 2 [file 136990332-supp.zip]

Archive with 5 entries (4 files):
- 1762-supp/
- 1762-supp/1762-supp.pdf
- 1762-supp/.DS_Store
- 1762-supp/01762-video.mp4
- 1762-supp/README.txt
