# Supplementary material
Source: ML conference proceedings conference paper supplement (https://www.ecva.net/papers/eccv_2022/papers_ECCV/html/136990332_ECCV_2022_paper.php)
Supplement: Supplementary file 2 [file 136990332-supp.zip › 1762-supp/README.txt]

video codec: mp4 
https://support.microsoft.com/en-us/windows/get-windows-media-player-81718e0d-cfce-25b1-aee3-94596b658287
